# 1 **Stochastic activation and bistability in a Rab GTPase regulatory network.**

2 **Urban Bezeljak<sup>1</sup>, Hrushikesh Loya<sup>2</sup>, Beata Kaczmarek<sup>1</sup>, Timothy E. Saunders<sup>3#</sup>, Martin Loose<sup>1#</sup>.**

3 <sup>1</sup>Institute for Science and Technology Austria (IST Austria), Klosterneuburg, Austria

4 <sup>2</sup>Indian Institute of Technology, Bombay, India

5 <sup>3</sup>Mechanobiology Institute and Department of Biological Sciences, National University of Singapore,  
6 Singapore

7

8 #Authors for correspondence: M.L.: [martin.loose@ist.ac.at](mailto:martin.loose@ist.ac.at); T.E.S., [dbsste@nus.edu.sg](mailto:dbsste@nus.edu.sg)

9

## 10 **Abstract**

11 Rab GTPases are the central regulators of intracellular traffic. Their function relies on a conformational  
12 change triggered by nucleotide exchange and hydrolysis. While this switch is well understood for an  
13 individual protein, how Rab GTPases collectively transition between states to generate a biochemical  
14 signal in space and time is unclear. Here, we combine in vitro reconstitution experiments with  
15 theoretical modeling to study a minimal Rab5 activation network. We find that positive feedback in this  
16 network gives rise to bistable switching of Rab5 activation and provide evidence that controlling the  
17 inactive population of Rab5 on the membrane can shape the network response. Together, our findings  
18 reveal new insights into the non-equilibrium properties and general principles of biochemical signaling  
19 networks underlying the spatiotemporal organization of the cell.

## 20 **Introduction**

21 Positive feedback is a core motif in biochemical circuits that can generate bistable behavior, where  
22 the system can collectively switch between an ON and OFF state (1). Regulatory networks  
23 incorporating positive feedback loops control various cellular processes, such as cell polarization (2),  
24 oocyte maturation (3), and cell cycle progression (4). Positive feedback has also been proposed to be  
25 important for the organization of membrane traffic by small GTPases (5–7). Despite such ubiquity, the  
26 molecular events underlying the emergent properties of these networks are currently poorly  
27 understood.

28 Small GTPases of the Rab family organize the eukaryotic endomembrane system by defining the  
29 biochemical identities of organelles and directing membrane traffic between intracellular  
30 compartments through vesicle formation, transport, docking, and fusion with the target organelle (8).  
31 Arguably the best characterized Rab GTPase is Rab5, which controls the maturation of early  
32 endosomes towards the lysosomal system (9). Like all small GTPases, Rabs can exist in either an

33 active GTP- or inactive GDP-bound state. Additionally, Rab GTPases possess one or two lipophilic  
34 geranylgeranyl chains on their C-terminal, which anchor them to the membrane surface (10). There,  
35 they recruit downstream effectors to orchestrate the vesicular flow. The transition between nucleotide  
36 states is controlled by guanine nucleotide exchange factors (GEFs) that catalyze exchange of GDP  
37 with GTP; and GTPase activating proteins (GAPs) catalyzing GTP hydrolysis (11). In their inactive  
38 GDP-bound state, the Rab GDP-dissociation inhibitor (GDI) extracts the Rab GTPase from the  
39 membrane and keeps it soluble in the cytoplasm (12). As a result, nucleotide exchange and hydrolysis  
40 drive dynamic cycling of the GTPase to and from the membrane. In the case of Rab5, the GEF Rabex5  
41 forms a complex with the Rab5 effector Rabaptin5 (13). Consequently, Rab5 is thought to recruit its  
42 own activator to establish a positive feedback motif, which was proposed to result in its ultrasensitive  
43 activation (14) and membrane accumulation (13, 15–19). However, whether these molecular  
44 interactions can indeed lead to switch-like activation and collective membrane binding of Rab5 is not  
45 known (20).

46 The reason for this lack of understanding is that the characterization of small GTPase networks on a  
47 systems level has remained challenging. First, the inherent complexity of the living cell makes *in vivo*  
48 control over reaction conditions and precise experimental readouts challenging. Second, in contrast  
49 to the situation *in vivo*, activity studies performed *in vitro* commonly relied on proteins without their  
50 physiological geranylgeranyl modifications and were performed in the absence of the GDI and  
51 membranes (17, 21). Accordingly, these simplified experimental setups can lead to non-physiological  
52 activation dynamics (22). Lastly, the input-output relationship of the Rab GTPase activation switch in  
53 a biologically relevant setting is currently unknown as previous *in vitro* assays of Rab regulation did  
54 not address the non-equilibrium dynamics of small GTPases under cycling conditions (15, 23, 24).

55 Here, we rebuild the dynamic network underlying Rab5 activation *in vitro* using a minimal set of purified  
56 components (Fig. 1 and S1): fluorescently labeled, prenylated Rab5 in complex with GDI;  
57 Rabex5:Rabaptin5; and biomimetic membranes. In combination with theoretical modeling, this  
58 experimental approach allowed us to assay Rab5 activation far from biochemical equilibrium and to  
59 study the mechanisms of collective Rab5 activation under controlled conditions.

## 60 **Results**

61 First, we set out to verify the activity of purified Rabex5:Rabaptin5 on Rab5[GDP] in complex with GDI.  
62 We loaded lipid-modified Rab5 with the fluorescent GDP analog mant-GDP and used its fluorescence  
63 intensity as a real-time readout of nucleotide exchange (13, 16, 17). With 60 nM GEF and in the  
64 absence of membranes, we could not detect nucleotide exchange on 250 nM Rab5[mant-GDP]:GDI.  
65 However, we found robust activation in the presence of small unilamellar vesicles (SUVs) (Fig. S2),  
66 confirming that the phospholipid bilayer is essential for activation of the Rab:GDI complex (25, 26).

67 To investigate the role of biological membranes for Rab5 activation, we utilized glass supported lipid  
68 bilayers (SLBs) as membrane substrates, combined with fluorescently labeled proteins and TIRF  
69 microscopy (Fig. 1A) (27). To recapitulate the intracellular pre-activation state, we first incubated the  
70 SLB with inactive CF488A-Rab5:GDI (500 nM), 0.5 mM GTP and 0.05 mM GDP. We included free  
71 GDI (2  $\mu$ M) to mimic cellular stoichiometric excess of RabGDI (28). We then initiated nucleotide  
72 exchange by adding 200 nM Rabex5:Rabaptin5 and followed the fluorescence of CF488A-Rab5 on  
73 the membrane. Starting from low basal level of fluorescence on the membrane surface, the addition  
74 of the GEF complex produced a characteristic rise in fluorescence intensity until the signal saturated  
75 after about 40 minutes (Fig. 1B), consistent with an accumulation of Rab5[GTP] on the membrane.  
76 Accordingly, SLBs can act as a membrane substrate for prenylated Rab5, allowing us to follow its  
77 collective activation and membrane binding in real time.

78 Positive feedback regulation typically gives rise to sigmoidal signal-response curves (29). To test for  
79 the presence of positive feedback in the Rabex5:Rabaptin5:Rab5 activation network we recorded  
80 Rab5 membrane binding after adding increasing amounts of the GEF complex (Fig. 1C). Strikingly,  
81 we found that this titration resulted in an apparent two-state response profile: while there was no  
82 activation at GEF concentrations below 20 nM even 150 minutes after Rabex5:Rabaptin5 injection,  
83 we found a 10- to 80-fold increase of fluorescence on the membrane with higher concentrations of  
84 Rabex5:Rabaptin5 (Fig. 1D). From the temporal activation curves, we extracted the relative maximal  
85 rate of Rab5 activation ( $k_{max}$ ) as well as the time delay needed to reach this rate ( $T_i$ ) (30) (Fig. S3,  
86 Materials and Methods). High GEF complex concentrations (400 nM) gave rise to an immediate  
87 increase in Rab5 fluorescence intensity. At intermediate GEF concentrations, we observed nearly flat  
88 intensity profiles for up to 2 hours before collective Rab5 activation (Fig. 1E). At low GEF  
89 concentrations, we observed no response within the measurement window (orange circles, Fig. 1E).  
90 We also performed extended time recordings at 8 nM GEF and saw no response even after up to 12  
91 hours (Fig. S4). Interestingly, the temporal delays needed to reach half activation increased linearly  
92 with the inverse of GEF complex concentrations (Fig. 1E, inset). Despite different delay times, all  
93 activation profiles had a similar sigmoidal shape (Fig. S5). By plotting  $k_{max}$  against GEF concentration,  
94 we found that nucleotide exchange showed high cooperativity (Fig. 1F) with a critical GEF  
95 concentration of around 28 nM, where we observed significant variations between the response  
96 curves, with some measurements having no significant response over the time course of the  
97 experiment. Below this point, no collective switching was detected, while higher GEF concentrations  
98 allowed for fast activation and Rab5 membrane accumulation, which gradually increased (17).

99 To better understand the dynamic response curves and the origin of the observed activation delays,  
100 we constructed a model of the minimal reaction network, which includes cooperative activation due to  
101 a direct interaction of Rab5[GTP] with its GEF complex (Fig. 1G, Supplementary Text). Precise details

102 of this cooperative interaction are not known, so in the model we take a conservative approach  
103 whereby the positive feedback is relatively weak. Solving the model using the Gillespie algorithm to  
104 incorporate biochemical noise (stochasticity) in the reactions (31) produces similar dynamics and time  
105 delays to those observed experimentally (Fig. 1H-K). In the absence of stochasticity, the predicted  
106 response curves deviated from the experiments: (1) at early times the intensity profiles were not flat,  
107 unlike measured experimentally; and (2) near the critical Rab5 concentration (~30nM), the model  
108 cannot replicate the broad range of activation times (Fig. S6). We cannot discount potential variations  
109 (e.g. precise initial protein concentrations) between each experiment playing a role in the observed  
110 results. However, given the highly controlled nature of our reconstituted experiment, we expect these  
111 fluctuations to be small. Together, our experimental and theoretical results provide clear evidence for  
112 positive feedback within a minimal Rab activation network sufficient to generate switch-like,  
113 ultrasensitive behavior. Furthermore, stochasticity is relevant for the system response near the critical  
114 switching concentration.

115 What are the molecular interactions giving rise to the observed cooperativity? It has been proposed  
116 that cooperative Rab5 activation is due to GTP-dependent, effector-mediated GEF recruitment (13,  
117 15–19). Alternatively, direct binding of Rabex5 to the negatively charged membrane could also  
118 enhance nucleotide exchange by retaining the GEF complex on the membrane (32). To test these  
119 possibilities, we prepared  $\Delta_{\text{RBD}}\text{Rabaptin5}$ , which lacks Rab5 binding domains (RBDs) (20); and  
120  $\Delta\text{Rabex5}$ , which misses putative membrane targeting motifs (16) (Fig. 2A). Of all GEF complex  
121 variants tested, we detected efficient Rab5 activation only for full length Rabex5:Rabaptin5 and  
122  $\Delta\text{Rabex5}:\text{Rabaptin5}$ . In contrast, there was no collective activation in the absence of Rabaptin5  
123 ( $\Delta\text{Rabex5}$ ) or for the GEF complex without the Rabaptin5 RBDs (Rabex5: $\Delta_{\text{RBD}}\text{Rabaptin5}$ ) (Fig. 2B).  
124 The same dependence on Rab5:Rabaptin5 interaction was also apparent in our model (Fig. 2C). Using  
125 fluorescently labeled Rabaptin5 and dual color imaging, we found that Rab5 and the GEF complex  
126 showed similar intensity traces in experiments (Fig. 2D) and in our model (Fig. 2E), confirming that  
127 Rabex5:Rabaptin5 is retained on the membrane surface by active Rab5[GTP] to engage the positive  
128 feedback loop (33, 34). Together, these results demonstrate that Rabaptin5 not only enhances the  
129 GEF activity of Rabex5 (17, 35), but that direct interactions between GTPase, GEF and effector in a  
130 ternary complex are essential for the cooperative activation of Rab5 and its collective binding to the  
131 membrane (20).

132 What could explain the long delay times and stochastic switching observed at intermediate  
133 concentration of the GEF complex? Typically, long lag phases are related to processes that rely on  
134 random nucleation events that trigger phases of rapid growth (36, 37). Importantly, these lag phases  
135 can be dramatically shortened in the presence of seeds that trigger activation. To test this prediction,  
136 we attached different amounts of GTP-loaded constitutively active Rab5Q80L-His<sub>10</sub> on SLBs with

137 nickel-chelating lipids (DOGS-NTA) before adding 80 nM Rabex5:Rabaptin5 (Fig. 2F). Without pre-  
138 activated Rab5 on the membrane (0 [DOGS-NTA]), activation occurred 20 min after addition of this  
139 concentration of Rabex5:Rabaptin5. In contrast, the time delays with Rab5Q80L-His<sub>10</sub> on 2 % [DOGS-  
140 NTA] membranes were 3-times shorter and completely absent with 5 % [DOGS-NTA] (Fig. 2G), while  
141 the maximal activation rates were not significantly changed. This data shows that membrane-bound  
142 Rab5[GTP] can act as a seed for Rab5 activation and membrane accumulation.

143 Next, we wanted to find out what could initiate the Rab5 activation switch in the absence of active  
144 protein on the membrane. As the presence of membranes is required to activate the Rab5:GDI  
145 complex, we predicted that inactive Rab5[GDP] existing on the membrane prior to addition of the GEF  
146 complex is the substrate for nucleotide exchange (22, 38). Indeed, with small amounts of sCy5-  
147 Rab5:GDI in a background of CF488A-labeled Rab5:GDI, we found individual sCy5-labeled proteins  
148 on the membrane even before adding Rabex5:Rabaptin5 (Fig. 3A). Using single molecule tracking,  
149 we found that non-activated sCy5-Rab5 diffused rapidly on the membrane and had a mean residence  
150 time of  $0.3 \pm 0.1$  s (Fig. 3B). After addition of the GEF complex, we found a sudden increase in sCy5-  
151 Rab5 particle counts, along with a sigmoidal increase of membrane-bound CF488A-Rab5. The  
152 histogram of membrane residence times of Rab5[GTP] and corresponding fits revealed two  
153 populations: a short-lived population with a residence of  $0.4 \pm 0.2$  s, similar to Rab5[GDP], and a long-  
154 lived population with a 10-times longer residence time ( $3.3 \pm 1.3$  s) (Fig. 3B). A similar membrane  
155 lifetime distribution was observed for Rab5 with the non-hydrolyzable GTP analog GMP-PNP (Fig. S7)  
156 indicating that the values for activated Rab5 are influenced by fluorophore bleaching and represent a  
157 lower bound of membrane-residence time. Together, these results indicate that Rab5 first transiently  
158 binds to the membrane in its GDP-bound state, before it is converted by Rabex5:Rabaptin5 to its long-  
159 lived GTP-bound state. Rab5[GTP] on the membrane can then act as seed that retains GEF complex  
160 and initiates the positive feedback. Accordingly, initial random activation events are likely the cause of  
161 the observed stochasticity for its collective transition to the active state.

162 How do the initial levels of membrane-bound Rab5 and the strength of the positive feedback affect the  
163 transition between the ON and OFF states? To answer this question, we used a coarse-grained  
164 (phenomenological) version of our model, which incorporated only binding ( $a_0$ ) and unbinding ( $a_2$ ) of  
165 Rab5 [R] on the membrane along with positive feedback ( $a_1$ , with activation concentration  $K$ ) (Fig. S8,  
166 Supplementary Text):  $\frac{d[R]}{dt} = a_0 + a_1 \frac{[R]^2}{[R]^2 + K^2} - a_2[R]$ . The parameter space that leads to GTPase  
167 switching (Fig. 3C and S9) reveals that the switch response (*i.e.* the fold change in membrane-bound  
168 Rab5) after activation is small when the basal binding rate is set high. Conversely, if the basal binding  
169 rates are too low, the critical threshold for switching fails to occur, even with stochastic fluctuations.

170 This reveals that the system switching is potentially highly tunable, and dependent on both the basal  
171 binding rate and positive feedback strength.

172 To experimentally test the model predictions for how GTPase activation is tuned, we first varied the  
173 rate of extraction of Rab5[GDP] by adding different amounts of free GDI in our experiments (Fig. 3D).  
174 We found that increasing the stoichiometric GDI excess lowered the basal background fluorescence  
175 prior to activation, prolonged activation delay times after GEF addition, and limited  $k_{max}$ , consistent  
176 with a decreased basal binding rate. Using our full model, we also see similar results when altering  
177 the level of free GDI (Fig. 3E) confirming that high membrane extraction rates of Rab5[GDP] cause  
178 long delay times and stochastic activation (39).

179 To increase basal Rab5 binding, we first replaced GTP in our experiment with GMP-PNP. As this GTP  
180 analog inhibits Rab5's high intrinsic GTPase activity (40), it should prevent extraction of activated  
181 Rab5 from the membrane and therefore lead to a more robust transition into the ON state. In  
182 agreement with this prediction, we observed immediate collective Rab5 membrane binding after  
183 adding 80 nM GEF complex with GMP-PNP and 2  $\mu$ M GDI, while the delay time was more than 36  
184 min when we used GTP (Fig. 3D, magenta curve). Preventing Rab5 membrane extraction in the full  
185 model but keeping other parameters fixed, we see that our model displays similar behavior for the  
186 GMP-PNP nucleotide exchange (Fig. 3E, magenta curve). Next, we added the Rab5-specific GDI  
187 dissociation factor - PRA1 to our experiments, which has been suggested to accelerate the release of  
188 Rab[GDP] from the GDI complex (41). Accordingly, it should also increase the basal GTPase binding  
189 rate and facilitate the collective activation switch. Indeed, with PRA1 in the membrane, we observed  
190 fast Rab5 activation with short delay times even at a Rabex5:Rabaptin5 concentration too low to  
191 support Rab5 activation on PRA1-free membranes (8 nM) (Fig. 3F). These findings show that despite  
192 not strictly required for Rab5 activation (38, 42), the presence of PRA1 in the endosomal membrane  
193 can lower the threshold for positive feedback initiation, making collective Rab5 activation more likely.

194 Conversely, further increasing Rab5's GTPase activity above its intrinsic rate should inhibit collective  
195 switching as it prevents effector recruitment of the GEF complex and facilitates extraction of Rab5  
196 from the membrane (Fig. 3C; moving to the left along the red line). To test this prediction, we performed  
197 experiments in the presence of purified full-length RabGAP-5 (SGSM3), a Rab5-specific GAP (43),  
198 which stimulates GTP hydrolysis by Rab5. We recorded the signaling response after addition of 80  
199 nM Rabex5:Rabaptin5 in the presence of increasing RabGAP-5 amounts (Fig. 4A) and found that  
200 while it increased the activation delay, it did not substantially affect the maximal rate of Rab5 activation  
201 (Fig. 4B and 4C). At RabGAP-5 concentrations between 100 and 250 nM the reconstituted network  
202 either showed successful activation events or no accumulation of Rab5 on the membrane for different  
203 replicates at identical initial conditions. Importantly, once the system was switched ON, we found that

204 even addition of 2  $\mu\text{M}$  GAP (Fig. 4D) does not completely reverse the system to its pre-activated state.  
205 Similarly, by increasing the dissociation rate  $a_2$  in our phenomenological model, we observed clear  
206 difference in switching responses after 150 minutes, depending on the initial state of the network (Fig.  
207 4E). This hysteretic response of the system confirms the bistable behavior of the Rab5 activation  
208 network.

209 Strikingly, at RabGAP-5 concentrations of 50 nM, we observed Rab5 activation fronts on the  
210 membrane, where areas of high Rab5 density coexisted next to low Rab5 density areas (in 9 out of  
211 13 experiments, in 3 experiments no obvious waves were noticed during activation, while in one  
212 experiment no activation occurred). This spatiotemporal activation pattern existed for more than 30  
213 min, during which the activation front spread at a velocity of 5  $\mu\text{m}/\text{min}$  before the system settled into a  
214 fully active state with Rab5 covering the SLB at high density (Fig. 4F, G). What could explain the  
215 emergence of this spatial pattern? Local activation of Rab5[GTP], due to random fluctuations, is  
216 reinforced and stabilized by positive feedback via engagement of Rabex5:Rabaptin5. This region of  
217 initial Rab5[GTP] activation will have higher probability of further Rab5[GTP] recruitment at its  
218 boundary than elsewhere on the surface, giving rise to a propagating activation front. This emergent  
219 property can be captured in our phenomenological model by introducing a diffusive term, where Rab5  
220 activation in presence of a GAP can spread at constant rate by propagating the positive feedback  
221 activation via an activation front (44). Such a front is dependent on the GAP activity and the threshold  
222 Rab5[GTP] density that can sustain the positive feedback activation (Fig. 4H, Supplementary Text). It  
223 is well known that dynamic biochemical systems composed of locally acting cooperative actuators and  
224 long-ranged inactivators can give rise to chemical waves on the cellular and tissue level (45–48). In  
225 our system, RabGAP-5 acts as a global inhibitor, rather than a long-ranged diffusing inhibitor, resulting  
226 in our relatively simpler spatio-temporal patterns of activation.

## 227 Discussion

228 To summarize, using *in vitro* reconstitution and theoretical modeling, we found that the minimal Rab5  
229 regulatory network is ultrasensitive and bistable, likely prerequisites for the decisive signaling reactions  
230 controlling vesicle traffic. We have demonstrated that the architecture of the Rab5 activation network  
231 supports the formation of spatiotemporal patterns such as activation fronts, as found for other bistable  
232 systems with a local positive feedback and global inhibition (46). We also found that Rab5 activation  
233 in this minimal network can occur stochastically, and we identified the low amounts of non-active  
234 Rab5[GDP] as a potential source for this stochastic behavior. While stochasticity and long delay times  
235 are generally disadvantageous for intracellular signaling reactions that rely on tight control, our *in vitro*  
236 experiments demonstrate that it is possible to tune the response of the Rab5 activation network by

237 regulating the stability of the Rab:GDI complex, either by the presence of a GDF in the membrane and  
238 possibly via GDI phosphoregulation (49).

239 Our study represents a systematic characterization of a minimal biochemical circuit of Rab GTPase  
240 activation. We have also provided examples for how additional regulatory interactions can be  
241 employed to direct and tune small GTPase activation in space and time. Of course, the composition  
242 of the cell provides more complex modes of regulation, both at the protein and membrane levels. Our  
243 *in vitro* system can be further extended to include other effectors or membrane compositions, making  
244 it an excellent testbed for probing the mechanisms of organelle identity formation during vesicle  
245 trafficking and the compartmentalization of the living cell. Furthermore, our approach can also be used  
246 to study the dynamic networks of other small GTPase families, such as Arf, Rac and Rho GTPases.

247

## 248 **References**

- 249 1. T. Gardner, C. Cantor, J. Collins, Construction of a genetic toggle switch in *Escherichia coli*.  
250 *Nature*. **403**, 339–342 (2000).
- 251 2. S. J. Altschuler, S. B. Angenent, Y. Wang, L. F. Wu, On the spontaneous emergence of cell  
252 polarity. *Nature*. **454**, 886–9 (2008).
- 253 3. C. Y. Huang, J. E. Ferrell, Ultrasensitivity in the mitogen-activated protein kinase cascade. *Proc.*  
254 *Natl. Acad. Sci. U. S. A.* **93**, 10078–83 (1996).
- 255 4. J. R. Pomerening, E. D. Sontag, J. E. Ferrell, Building a cell cycle oscillator: hysteresis and  
256 bistability in the activation of Cdc2. *Nat. Cell Biol.* **5**, 346–51 (2003).
- 257 5. M. Zerial, H. McBride, Rab proteins as membrane organizers. *Nat. Rev. Mol. Cell Biol.* **2**, 107–  
258 17 (2001).
- 259 6. E. Mizuno-Yamasaki, F. Rivera-Molina, P. Novick, GTPase networks in membrane traffic.  
260 *Annu. Rev. Biochem.* **81**, 637–59 (2012).
- 261 7. F. A. Barr, Rab GTPases and membrane identity: Causal or inconsequential? *J. Cell Biol.* **202**,  
262 191–199 (2013).
- 263 8. H. Stenmark, Rab GTPases as coordinators of vesicle traffic. *Nat. Rev. Mol. Cell Biol.* **10**, 513–  
264 25 (2009).
- 265 9. A. Zeigerer *et al.*, Rab5 is necessary for the biogenesis of the endolysosomal system in vivo.  
266 *Nature*. **485**, 465–70 (2012).



- 267 10. A. Kalinin *et al.*, Expression of mammalian geranylgeranyltransferase type-II in *Escherichia coli*  
268 and its application for in vitro prenylation of Rab proteins. *Protein Expr. Purif.* **22**, 84–91 (2001).
- 269 11. J. Cherfils, M. Zeghouf, Regulation of small GTPases by GEFs, GAPs, and GDIs. *Physiol. Rev.*  
270 **93**, 269–309 (2013).
- 271 12. K. Gavriljuk, A. Itzen, R. S. Goody, K. Gerwert, C. Kötting, Membrane extraction of Rab proteins  
272 by GDP dissociation inhibitor characterized using attenuated total reflection infrared  
273 spectroscopy. *Proc. Natl. Acad. Sci. U. S. A.* **110**, 13380–5 (2013).
- 274 13. Z. Zhang *et al.*, Molecular mechanism for Rabex-5 GEF activation by Rabaptin-5. *Elife.* **3**, 1–  
275 19 (2014).
- 276 14. J. E. Ferrell, S. H. Ha, Ultrasensitivity part I: Michaelian responses and zero-order  
277 ultrasensitivity. *Trends Biochem. Sci.* **39**, 496–503 (2014).
- 278 15. R. Lippé, M. Miaczynska, V. Rybin, A. Runge, M. Zerial, Functional synergy between Rab5  
279 effector Rabaptin-5 and exchange factor Rabex-5 when physically associated in a complex.  
280 *Mol. Biol. Cell.* **12**, 2219–28 (2001).
- 281 16. A. Delprato, E. Merithew, D. G. Lambright, Structure, exchange determinants, and family-wide  
282 Rab specificity of the tandem helical bundle and Vps9 domains of Rabex-5. *Cell.* **118**, 607–617  
283 (2004).
- 284 17. A. Delprato, D. G. Lambright, Structural basis for Rab GTPase activation by VPS9 domain  
285 exchange factors. *Nat. Struct. Mol. Biol.* **14**, 406–12 (2007).
- 286 18. H. Stenmark, G. Vitale, O. Ullrich, M. Zerial, Rabaptin-5 is a direct effector of the small GTPase  
287 Rab5 in endocytic membrane fusion. *Cell.* **83**, 423–32 (1995).
- 288 19. H. Horiuchi *et al.*, A novel Rab5 GDP/GTP exchange factor complexed to Rabaptin-5 links  
289 nucleotide exchange to effector recruitment and function. *Cell.* **90**, 1149–59 (1997).
- 290 20. S. Kälin, D. T. Hirschmann, D. P. Buser, M. Spiess, Rabaptin5 is recruited to endosomes by  
291 Rab4 and Rabex5 to regulate endosome maturation. *J. Cell Sci.* **128**, 4126–4137 (2015).
- 292 21. L. Langemeyer *et al.*, Diversity and plasticity in Rab GTPase nucleotide release mechanism  
293 has consequences for Rab activation and inactivation. *Elife.* **3**, e01623 (2014).
- 294 22. S. Schoebel, L. K. Oesterlin, W. Blankenfeldt, R. S. Goody, A. Itzen, RabGDI displacement by  
295 DrrA from *Legionella* is a consequence of its guanine nucleotide exchange activity. *Mol. Cell.*  
296 **36**, 1060–72 (2009).

- 297 23. T. Ohya *et al.*, Reconstitution of Rab- and SNARE-dependent membrane fusion by synthetic  
298 endosomes. *Nature*. **459**, 1091–7 (2009).
- 299 24. L. Langemeyer, A. Perz, D. Kümmel, C. Ungermann, A guanine nucleotide exchange factor  
300 (GEF) limits Rab GTPase-driven membrane fusion. *J. Biol. Chem.* **293**, 731–739 (2018).
- 301 25. L. L. Thomas, J. C. Fromme, GTPase cross talk regulates TRAPP11 activation of Rab11  
302 homologues during vesicle biogenesis. *J. Cell Biol.* **215**, 499–513 (2016).
- 303 26. L. L. Thomas, S. A. van der Vegt, J. C. Fromme, A Steric Gating Mechanism Dictates the  
304 Substrate Specificity of a Rab-GEF. *Dev. Cell.* **48**, 100-114.e9 (2019).
- 305 27. P. a. Nguyen, C. M. Field, A. C. Groen, T. J. Mitchison, M. Loose, Using supported bilayers to  
306 study the spatiotemporal organization of membrane-bound proteins. *Methods Cell Biol.* **128**,  
307 223–41 (2015).
- 308 28. S. R. Pfeffer, A. B. Dirac-Svejstrup, T. Soldati, Rab GDP dissociation inhibitor: putting rab  
309 GTPases in the right place. *J. Biol. Chem.* **270**, 17057–9 (1995).
- 310 29. J. E. Ferrell, W. Xiong, Bistability in cell signaling: How to make continuous processes  
311 discontinuous, and reversible processes irreversible. *Chaos*. **11**, 227–236 (2001).
- 312 30. K. M. C. Tjørve, E. Tjørve, The use of Gompertz models in growth analyses, and new  
313 Gompertz-model approach: An addition to the Unified-Richards family. *PLoS One*. **12**,  
314 e0178691 (2017).
- 315 31. A. Landeros *et al.*, BioSimulator.jl: Stochastic simulation in Julia. *Comput. Methods Programs*  
316 *Biomed.* **167**, 23–35 (2018).
- 317 32. H. Zhu *et al.*, Rabaptin-5-independent membrane targeting and Rab5 activation by Rabex-5 in  
318 the cell. *Mol. Biol. Cell.* **18**, 4119–28 (2007).
- 319 33. H. Zhu, H. Qian, G. Li, Delayed onset of positive feedback activation of Rab5 by Rabex-5 and  
320 Rabaptin-5 in endocytosis. *PLoS One*. **5**, e9226 (2010).
- 321 34. A. Jilkine, S. B. Angenent, L. F. Wu, S. J. Altschuler, A density-dependent switch drives  
322 stochastic clustering and polarization of signaling molecules. *PLoS Comput. Biol.* **7**, e1002271  
323 (2011).
- 324 35. R. Lippe, H. Horiuchi, A. Runge, M. Zerial, Expression, purification, and characterization of  
325 Rab5 effector complex, Rabaptin-5/Rabex-5. *Regul. Eff. Small Gtpases, Pt E.* **329**, 132–145  
326 (2001).

- 327 36. P. Arosio, T. P. J. Knowles, S. Linse, On the lag phase in amyloid fibril formation. *Phys. Chem.*  
328 *Chem. Phys.* **17**, 7606–18 (2015).
- 329 37. E. Nishida, H. Sakai, Kinetic analysis of actin polymerization. *J. Biochem.* **93**, 1011–20 (1983).
- 330 38. Y.-W. Wu *et al.*, Membrane targeting mechanism of Rab GTPases elucidated by semisynthetic  
331 protein probes. *Nat. Chem. Biol.* **6**, 534–40 (2010).
- 332 39. N. E. Buchler, F. R. Cross, Protein sequestration generates a flexible ultrasensitive response  
333 in a genetic network. *Mol. Syst. Biol.* **5**, 1–7 (2009).
- 334 40. V. Rybin *et al.*, GTPase activity of Rab5 acts as a timer for endocytic membrane fusion. *Nature.*  
335 **383**, 266–9 (1996).
- 336 41. U. Sivars, D. Aivazian, S. R. Pfeffer, Yip3 catalyses the dissociation of endosomal Rab-GDI  
337 complexes. *Nature.* **425**, 856–9 (2003).
- 338 42. J. Blümer *et al.*, RabGEFs are a major determinant for specific Rab membrane targeting. *J.*  
339 *Cell Biol.* **200**, 287–300 (2013).
- 340 43. A. K. Haas, E. Fuchs, R. Kopajtich, F. A. Barr, A GTPase-activating protein controls Rab5  
341 function in endocytic trafficking. *Nat. Cell Biol.* **7**, 887–93 (2005).
- 342 44. D. J. Jörg *et al.*, The proneural wave in the Drosophila optic lobe is driven by an excitable  
343 reaction-diffusion mechanism. *Elife.* **8**, 1–34 (2019).
- 344 45. Gierer, Meinhardt, A Theory of Biological Pattern Formation. *Kybernetik.* **12**, 30–39 (1972).
- 345 46. V. E. Deneke, S. Di Talia, Chemical waves in cell and developmental biology. *J. Cell Biol.* **217**,  
346 1193–1204 (2018).
- 347 47. C. Brachmann, A. Davies, G. Cost, deletion strains derived from *Saccharomyces cerevisiae*  
348 S288C: a useful set of strains and plasmids for PCR-mediated gene disruption and other  
349 applications. *YEAST- ....* **132**, 115–132 (1998).
- 350 48. A. M. Turing, The chemical basis of morphogenesis. *Philos. Trans. R. Soc. Lond. B. Biol. Sci.*  
351 **237**, 37–72 (1952).
- 352 49. O. Steele-Mortimer, J. Gruenberg, M. J. Clague, Phosphorylation of GDI and membrane cycling  
353 of rab proteins. *FEBS Lett.* **329**, 313–8 (1993).
- 354

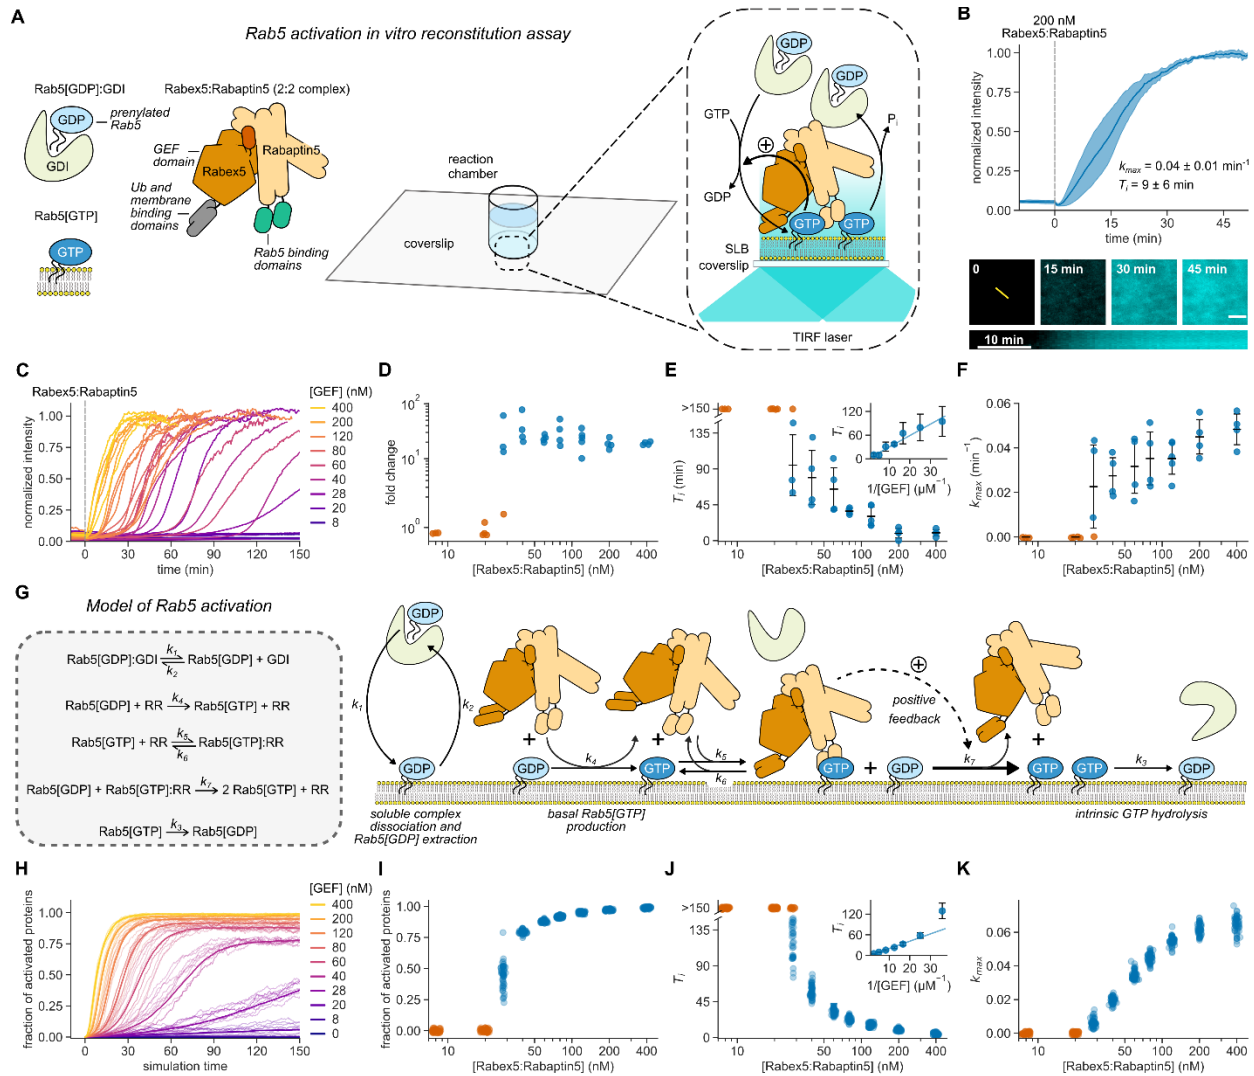

355 **Fig. 1. Rab5:GDI activation on phospholipid membranes is ultrasensitive and stochastic.**

356 **(A)** Schematic of Rab5 activation reconstitution assay on a supported lipid bilayer (SLB). **(B)** Top

357 panel: addition of Rabex5:Rabaptin5 triggers nucleotide exchange by CF488A-Rab5, which can be

358 followed by an increase of fluorescence intensity on the membrane surface. Solid line is mean

359 normalized intensity, shaded area corresponds to SD (n = 4). Bottom: micrographs of CF488A-Rab5

360 binding to the SLB after addition of 200 nM GEF complex and corresponding kymograph (below) taken

361 along the yellow line. Scale bar = 5  $\mu\text{m}$ . **(C)** Rab5 intensity traces obtained at increasing

362 Rabex5:Rabaptin5 concentrations. **(D)** Rab5:GDI- Rabex5:Rabaptin5 activation response curve. The

363 fold change was calculated by dividing the fluorescence intensity at steady state with the average

364 signal 10 min before GEF addition. **(E)** Activation delay  $T_i$  decreases with higher Rabex5:Rabaptin5

365 concentration. Where no detectable activation was observed within 150 min, the  $T_i$ s are denoted as

366  $>150$  min and shown in orange. Error bars are SD. **(F)** Relative maximum rates  $k_{max}$  against the GEF

367 complex concentration reveal cooperativity of Rab5 activation. Without detectable activation within

368 150 min, the activation rate was determined to be 0 and the corresponding points are depicted in  
369 orange. Error bars are means  $\pm$  SD. **(G)** Schematic representation of modeled molecular interactions.  
370 We constructed a model of the minimal Rab5 activation network based on the known literature  
371 (13, 15-19, 38). We then derived ODEs based on mass action kinetics. **(H)** Stochastic model  
372 simulations of Rab5 activation at increasing Rabex5:Rabaptin5 particle numbers. Shown are average  
373 curves from 50 individual runs in bold and 10 random traces per condition. **(I - K)** Signal fold change,  
374 temporal delays and relative maximum rates from the stochastic simulations in (H). We ran 50  
375 individual stochastic simulations per condition.

376

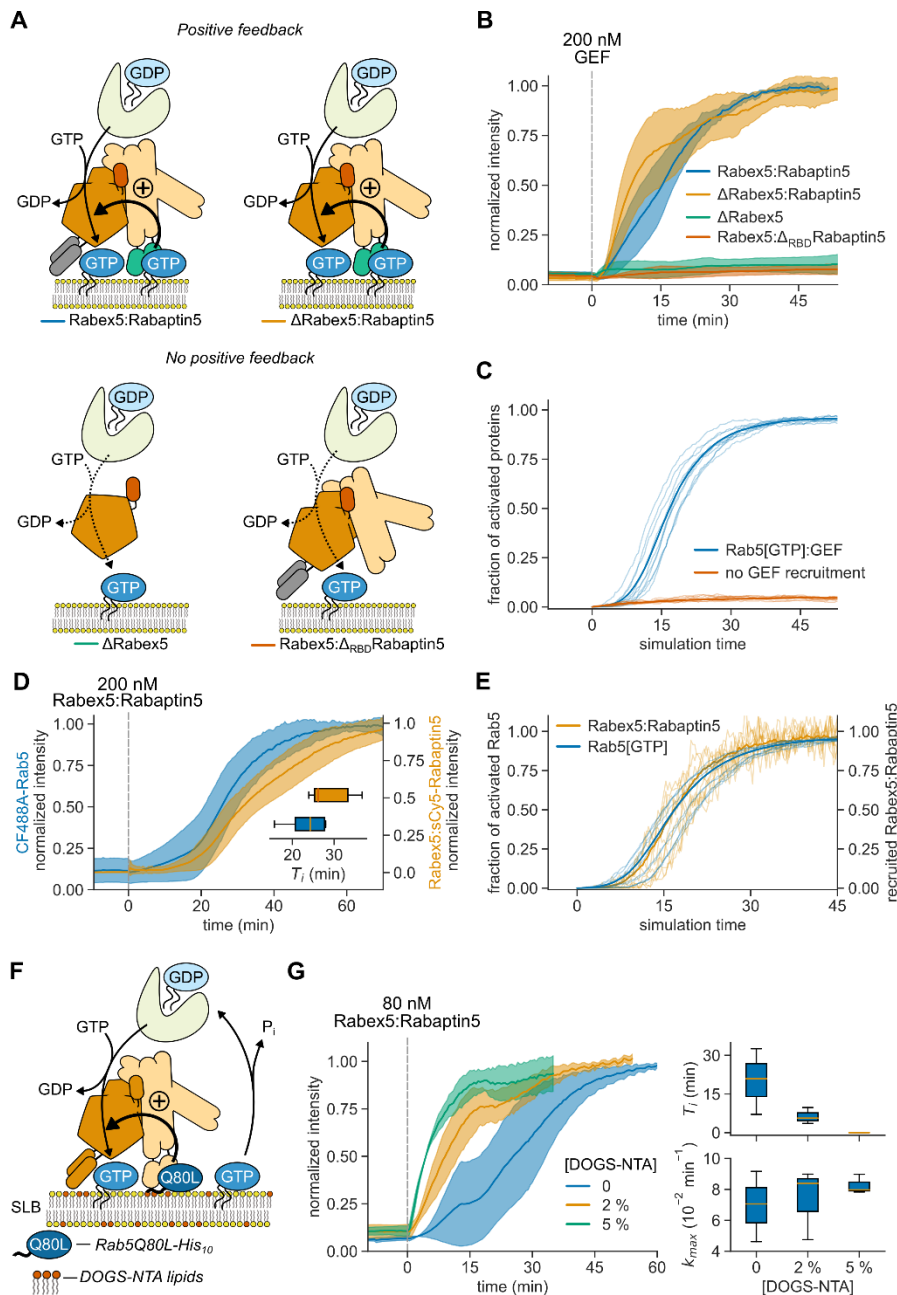

377 **Fig. 2. Positive feedback of Rab5 activation depends on GEF recruitment.**

378 **(A)** Illustration of protein interactions responsible for collective Rab5 switching. Positive feedback  
 379 originates from a direct interaction between Rabex5:Rabaptin5 and Rab5[GTP]. **(B)** Fluorescence  
 380 intensity traces obtained from experiments depicted in (A). Solid lines are mean normalized intensities,  
 381 shaded areas are SD (Rabex5:Rabaptin5,  $\Delta$ Rabex5:Rabaptin5  $n = 4$ ;  $\Delta$ Rabex5,  
 382 Rabex5: $\Delta$ RBD Rabaptin5  $n = 3$ ). **(C)** Stochastic model simulations with and without  
 383 Rabex5:Rabaptin5:Rab5[GTP] complex formation ( $k_5, k_6 = 0$ ) for 200 Rabex5:Rabaptin5 particles.  
 384 Average curves from 50 individual runs are depicted in bold with 10 random traces per condition. **(D)**  
 385 Kinetic traces of CF488A-Rab5 and Rabex5:sCy5-Rabaptin5 activation. Solid line is mean relative

386 normalized fluorescence intensity, shaded area is SD ( $n = 5$ ). Inset:  $T_i$  for CF488A-Rab5 (blue) and  
387 Rabex5:sCy5-Rabaptin5 (orange). **(E)** Stochastic model simulations for Rab5 and Rabex5:Rabaptin5  
388 membrane binding for 200 Rabex5:Rabaptin5 particles. Shown are curves from 50 independent runs,  
389 the mean line is depicted bold with 10 random traces per condition. **(F)** Schematic of the reconstitution  
390 experiment with pre-activated SLB-immobilized Rab5Q80L-His<sub>10</sub>[GTP]. **(G)** Collective switching is  
391 faster with pre-activated Rab5. Left: Rab5 switching time courses in presence of 500 nM Rab5Q80L-  
392 His<sub>10</sub> with increasing DOGS-NTA lipid concentration in the SLB. Solid line is mean normalized  
393 fluorescence intensity over time, shaded area is mean  $\pm$  SD ( $n = 3$ ). Right: corresponding time delays  
394  $T_i$  and relative maximum rates  $k_{max}$ .

395

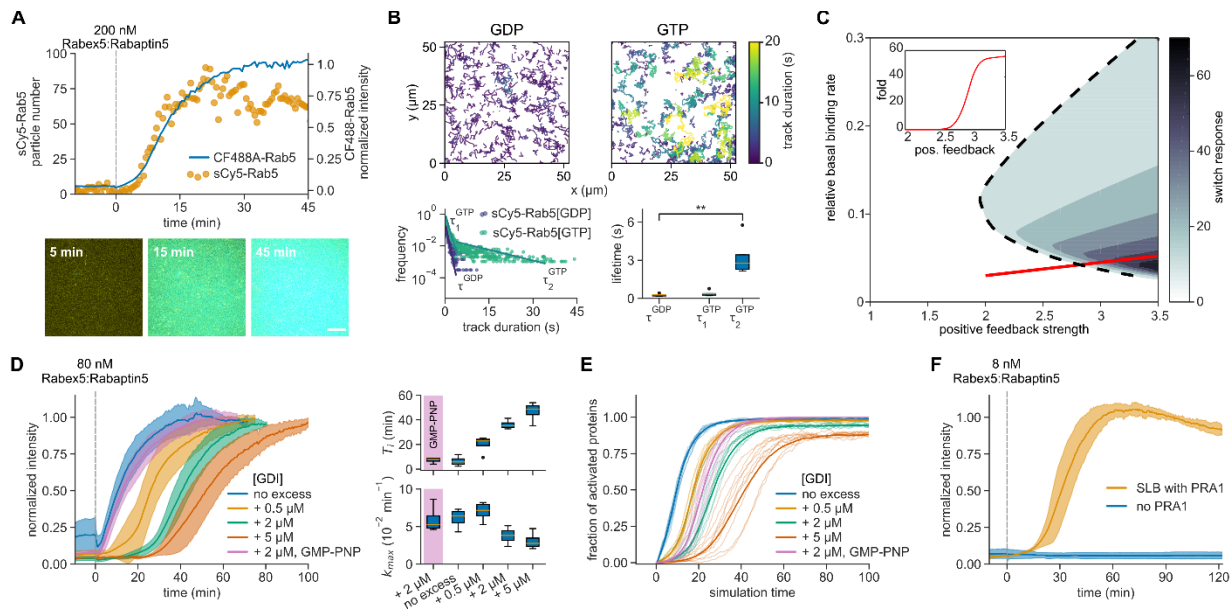

396 **Fig. 3. Rab5:GDI activation is tuned by free Rab5[GDP] abundance.**  
 397 **(A)** Rab5 cycles between the membrane and solution before and after nucleotide exchange. Top:  
 398 sCy5-Rab5 molecule counts per frame and collective CF488A-Rab5 activation. Bottom: snapshots of  
 399 the activation reaction. sCy5- and CF488A-Rab5 are depicted in yellow and cyan, respectively. Scale  
 400 bar is 10  $\mu\text{m}$ . **(B)** Rab5 single molecule trajectories reveal GDP- and GTP-bound proteins on the  
 401 membrane. Top: 500 tracks of membrane-bound sCy5-Rab5 particles before (GDP) and after (GTP)  
 402 activation. Bottom: frequency histogram identifies two populations with distinct lifetimes. A  
 403 monoexponential decay before activation with lifetime  $\tau^{\text{GDP}}$  and two-exponential decay with lifetimes  
 404  $\tau_1^{\text{GTP}}$  and  $\tau_2^{\text{GTP}}$ , respectively ( $n = 5$ ). **(C)** Parameter phase space of the phenomenological model for  
 405 Rab5 switching, depending on the basal rate of activation ( $a_0/a_2K$ ) and the strength of positive  
 406 feedback ( $a_1/a_2K$ ). Switching is defined as the relative difference in steady-state concentration relative  
 407 to the scenario with no positive feedback. Inset: fold activation along the red line in the diagram.  
 408 Stochasticity introduced by solving the phenomenological model within a Fokker-Planck framework.  
 409 See text for parameter definitions. **(D)** Stoichiometric GDI excess over Rab5 affects delay of Rab5  
 410 activation *in vitro*. Left: solid lines are mean normalized intensities over time, shaded areas correspond  
 411 to SD ( $n = 3$ ). Right: corresponding activation  $T_i$  and relative maximum rates  $k_{max}$ . **(E)** Stochastic  
 412 simulations of the full model for varying initial amounts of GDI excess (0 – 2000 particle number).  
 413 Shown are curves from 10 random runs per condition, the mean line from 50 runs is depicted bold. **(F)**  
 414 SLB-bound PRA1 enhances Rab5 activation at low GEF concentrations. Solid lines are mean  
 415 normalized fluorescence intensities, shaded areas correspond to SD ( $n = 3$ ).

416



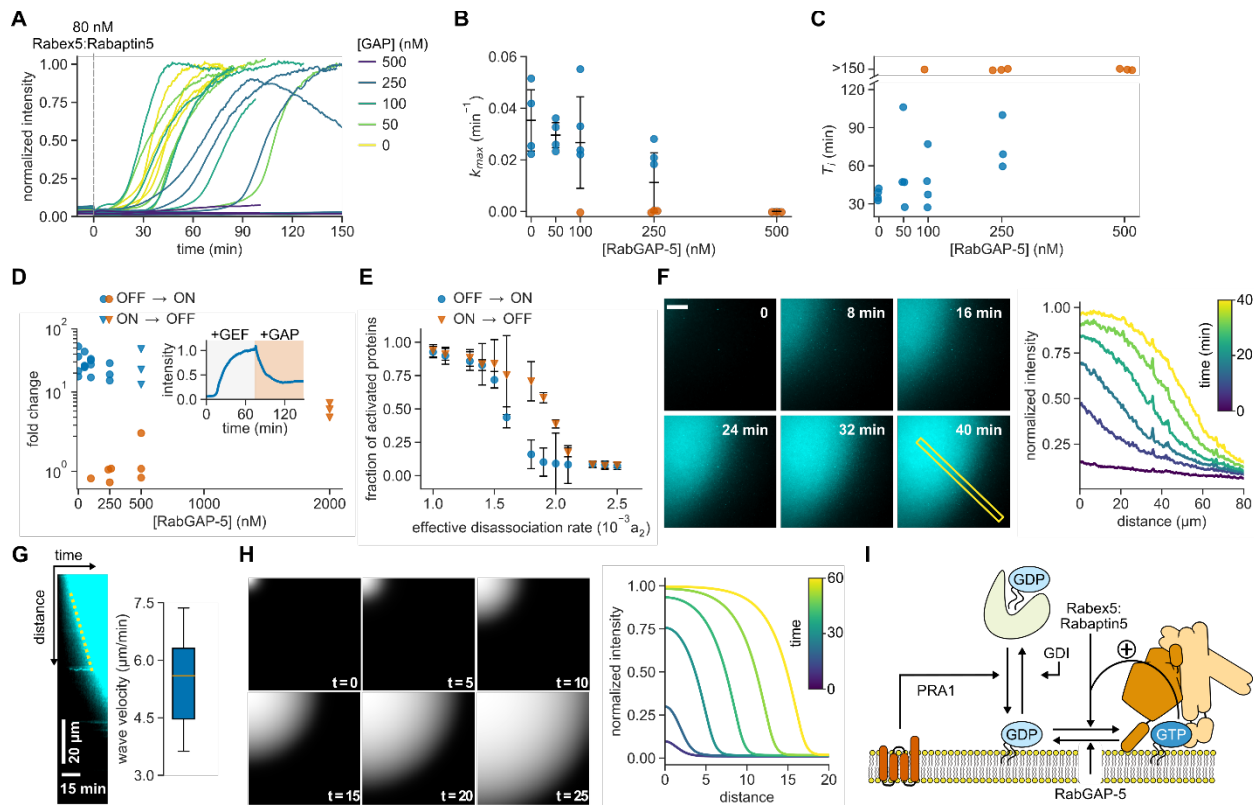

417 **Fig. 4. GAP activity reveals bistability of the reconstituted network.**

418 **(A)** Effect of RabGAP-5 on Rab5 activation. Shown are time courses at increasing GAP  
419 concentrations. **(B)** Maximal rates  $k_{max}$  of Rab5 activation for curves shown in (A). Without detectable  
420 activation within 150 min, the activation rate was set to 0 and the corresponding points are depicted  
421 in orange. Error bars are SD. **(C)** Activation delay  $T_i$  for data presented in (A). Without detectable  
422 activation, the times to inflection point are denoted as >150 min (orange). **(D)** GAP titration response  
423 curve. The fold change was calculated by dividing the fluorescence intensity at steady state with the  
424 average fluorescence signal 10 min before GEF addition. For ON  $\rightarrow$  OFF switching, the system first  
425 reached active state (ON) with 80 nM GEF. Then, RabGAP-5 was added and the reaction was followed  
426 until the system reached a new steady state (OFF). Inset: ON  $\rightarrow$  OFF switching time course with 2  $\mu$ M  
427 RabGAP-5. **(E)** Changing the dissociation rate reveals hysteresis in switching of the phenomenological  
428 model after 150 minutes. Shown are means of 20 simulations, error bars are  $\pm$  SD. **(F)** Left: Rab5  
429 activation wave spreading across the SLB. Scale bar is 20  $\mu$ m. Times indicate relative duration after  
430 start of acquisition, not time after addition of GEF complex. Right: fluorescence intensity profile of the  
431 indicated area. **(G)** Kymograph of the indicated area in (F) and mean wave velocity. Wave velocity  
432 was determined from the slope of fluorescence increase in generated kymographs ( $n = 6$ ). **(H)**  
433 Simulated Rab5 activation front from including diffusion,  $D$ , within the phenomenological model; see  
434 Supplementary Text Eq. 6. Solution in terms of the dimensionless distance  $\frac{x}{\sqrt{D/a_2}}$ . **(I)** Overview of the  
435 reconstituted Rab5 network regulation.

436 **Acknowledgments**

437 The authors sincerely thank B. Simons, K. Kruse, M. Howard, E. Hannezo, A. Yap, T. Lecuit, and J.  
438 Brugués for discussions and valuable feedback on the manuscript. Additionally, we thank K. Loibl,  
439 other Loose lab members and the Scientific Service Units at the IST Austria for their support. **Funding:**  
440 this work was supported by the Human Frontier Science Program (HFSP YIP 4193) as well as the  
441 European Research Council (ERC StG 679239). T.E.S. is grateful to the Kavli Institute, Santa Barbara,  
442 which supported his visit during part of the manuscript preparation (supported in part by NSF Grant  
443 No. PHY-1748958, NIH Grant No. R25GM067110, and the Gordon and Betty Moore Foundation Grant  
444 No. 2919.01). **Author contributions:** Conceptualization, M.L.; Methodology, M.L., T.E.S. and U.B.;  
445 Software, T.E.S. and H.L.; Validation, U.B., H.L., T.E.S.; Formal Analysis, U.B., H.L. and T.E.S.;  
446 Investigation, U.B., B.K., H.L. and T.E.S.; Resources, U.B., B.K., H.L. and T.E.S.; Data Curation, U.B.,  
447 H.L., T.E.S.; Writing - Original Draft, M.L., T.E.S. and U.B.; Writing - Review & Editing, U.B., H.L., B.K.,  
448 T.E.S., M.L.; Visualization, U.B. and T.E.S.; Supervision, M.L. and T.E.S.; Project Administration, M.L.  
449 and T.E.S.; Funding Acquisition, T.E.S. and M.L. **Competing interests:** the authors declare no  
450 competing interests. **Data and materials availability:** all data needed to evaluate and reproduce the  
451 reported conclusions is available in the manuscript or the supplementary materials.

452

453 **List of Supplementary Materials**

454 Materials and Methods  
455 Supplementary Text  
456 Figs. S1 to S9  
457 Tables S1 to S3  
458 References (50 – 61)  
459 Movies S1 to S6
